# Supplementary material for: Chemical-biological degradation of polyethylene combining Baeyer–Villiger oxidation and hydrolysis reaction of cutinase
Source: Royal Society of Chemistry journal article supplement (doi:10.1039/d2gc00425a), 2022-01-01
Supplement: d2gc00425a1.pdf [file d2gc00425a1.pdf]

## Abbreviations

<sup>m</sup>CPBA, m-chloroperoxybenzoic acid

CALB, Immobilized lipase from *Candida antarctica*

TF, Transforming factor, ratio of oxidized functional groups

EA, Ethyl acetate

M6, *T. fusca* cutinase mutant, D204C/E253C/H184S/Q92G/F209I/I213K

LDPE, Low-density polyethylene

<sub>UV</sub>PE, LDPE irradiated by UVC for 8 d

EA-<sub>UV</sub>PE, <sub>UV</sub>PE soaked in ethyl acetate for 1 d

<sub>CALB-UV</sub>PE, Using CALB-EA-H<sub>2</sub>O<sub>2</sub> catalysis system to treat <sub>UV</sub>PE for 1 d

<sub>CALB-UV</sub>PE-M6, Using *T. fusca* cutinase M6 hydrolysis system to treat <sub>CALB-UV</sub>PE for 7 d

<sub>CPBA</sub>PE, Using <sup>m</sup>CPBA catalysis system to treat LDPE

<sub>CPBA</sub>PE-M6, Using *T. fusca* cutinase M6 hydrolysis system to treat <sub>CPBA</sub>PE for 7 d

EA-<sub>CPBA</sub>PE, <sub>CPBA</sub>PE soaked in ethyl acetate for 1 d

<sub>CALB-CPBA</sub>PE, Using CALB-EA-H<sub>2</sub>O<sub>2</sub> catalysis system to treat <sub>CPBA</sub>PE for 1 d

<sub>CALB-CPBA</sub>PE-M6, Using *T. fusca* cutinase M6 hydrolysis system to treat <sub>CALB-CPBA</sub>PE for 7 d

Changes to the morphology of polyethylene under different oxidation treatments

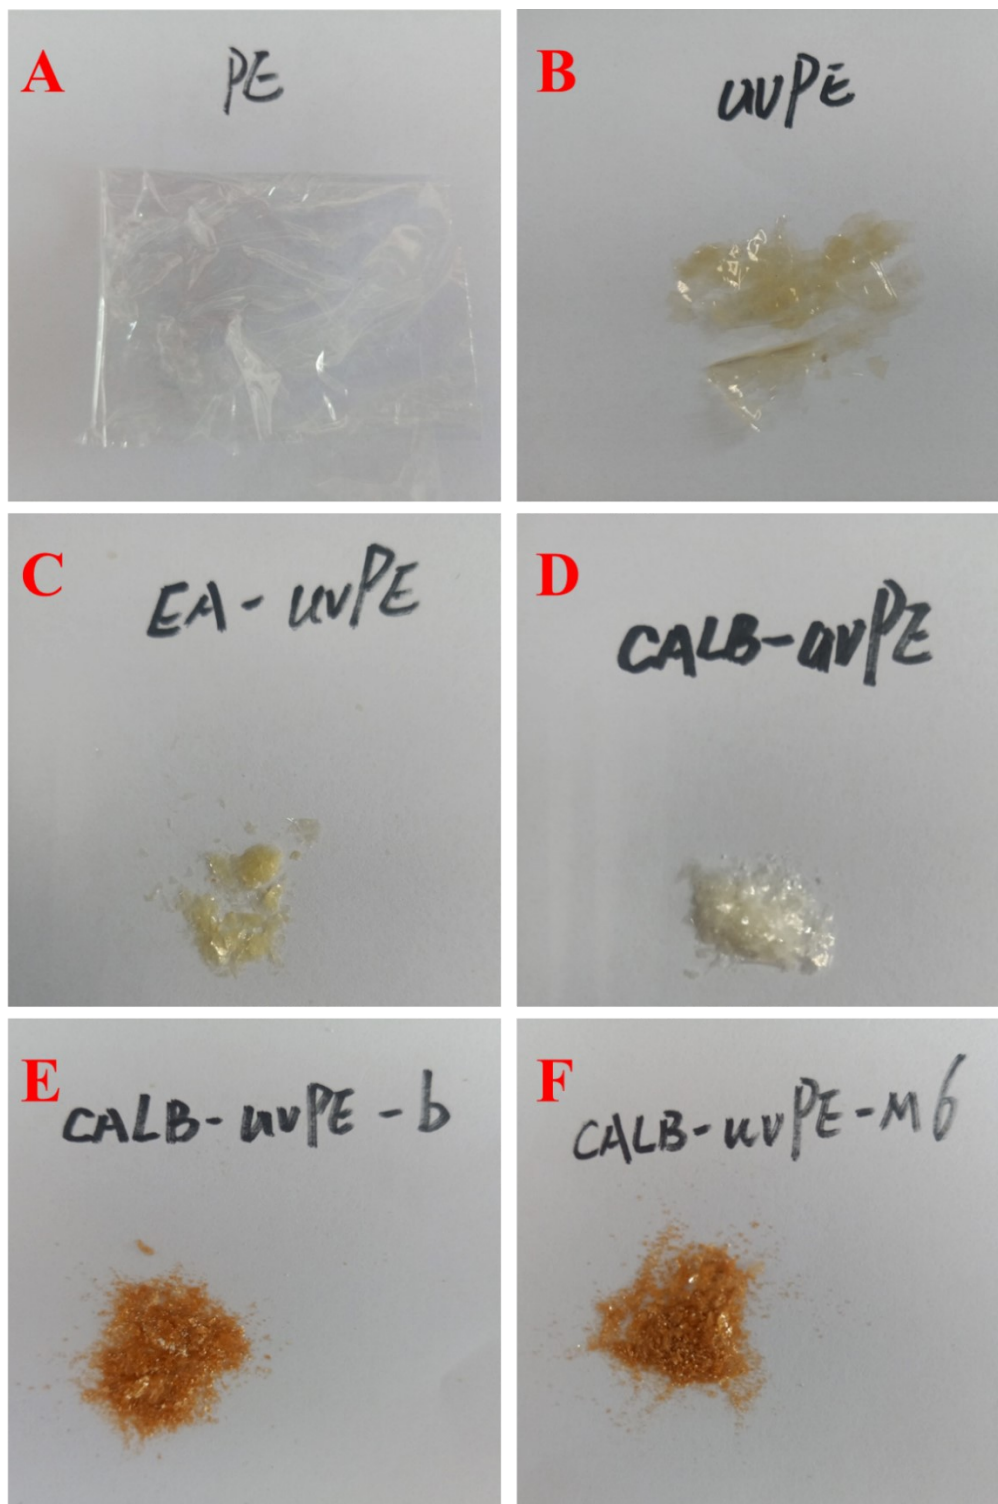

Fig. S1 Changes in polyethylene morphology during the treatment of LDPE by the CALB-EA-H<sub>2</sub>O<sub>2</sub> catalytic system and *T. fusca* cutinase M6 hydrolysis system (pathway I).

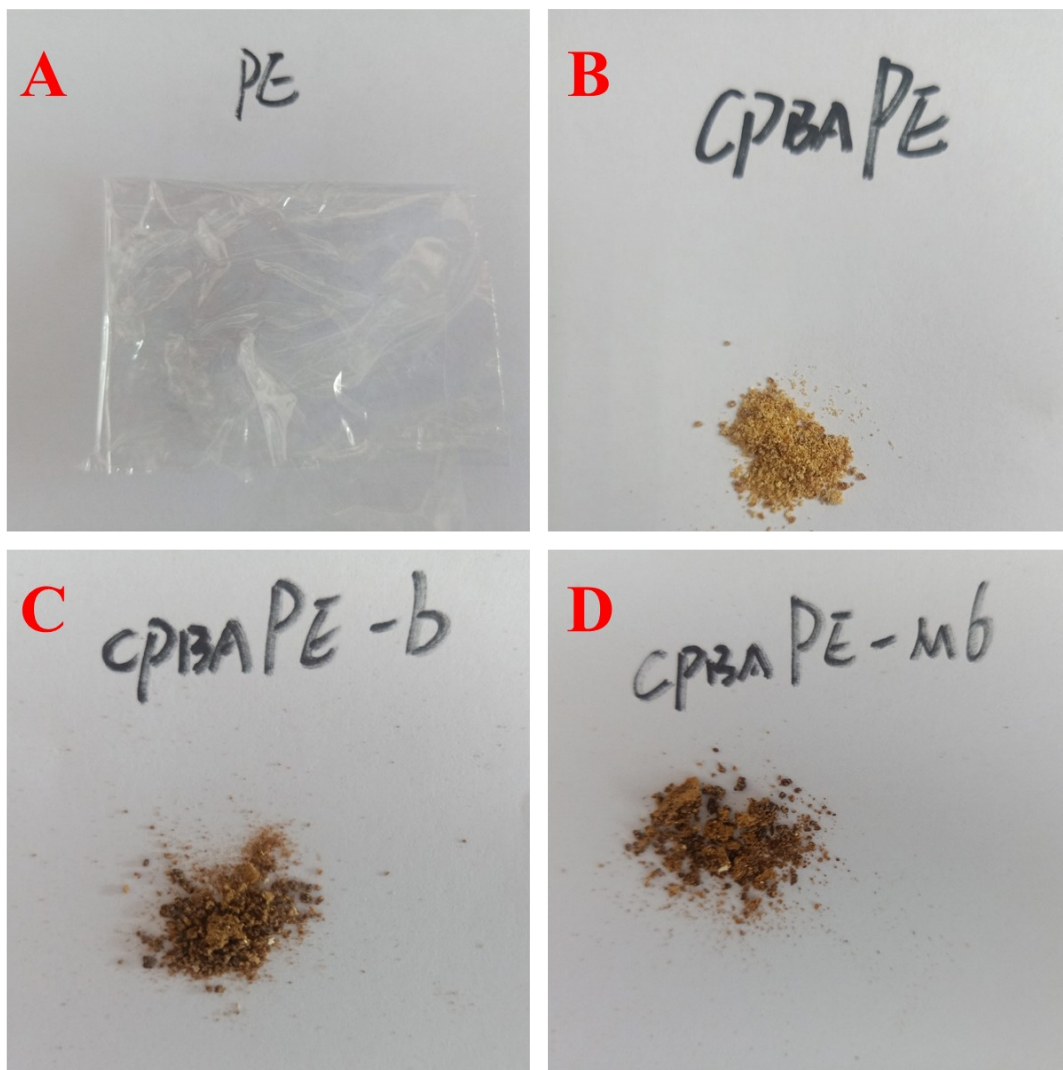

Fig. S2 <sup>m</sup>CPBA catalytic system and *T. fusca* cutinase M6 hydrolysis system. polyethylene morphology changes during the treatment of LDPE. (Pathway II)

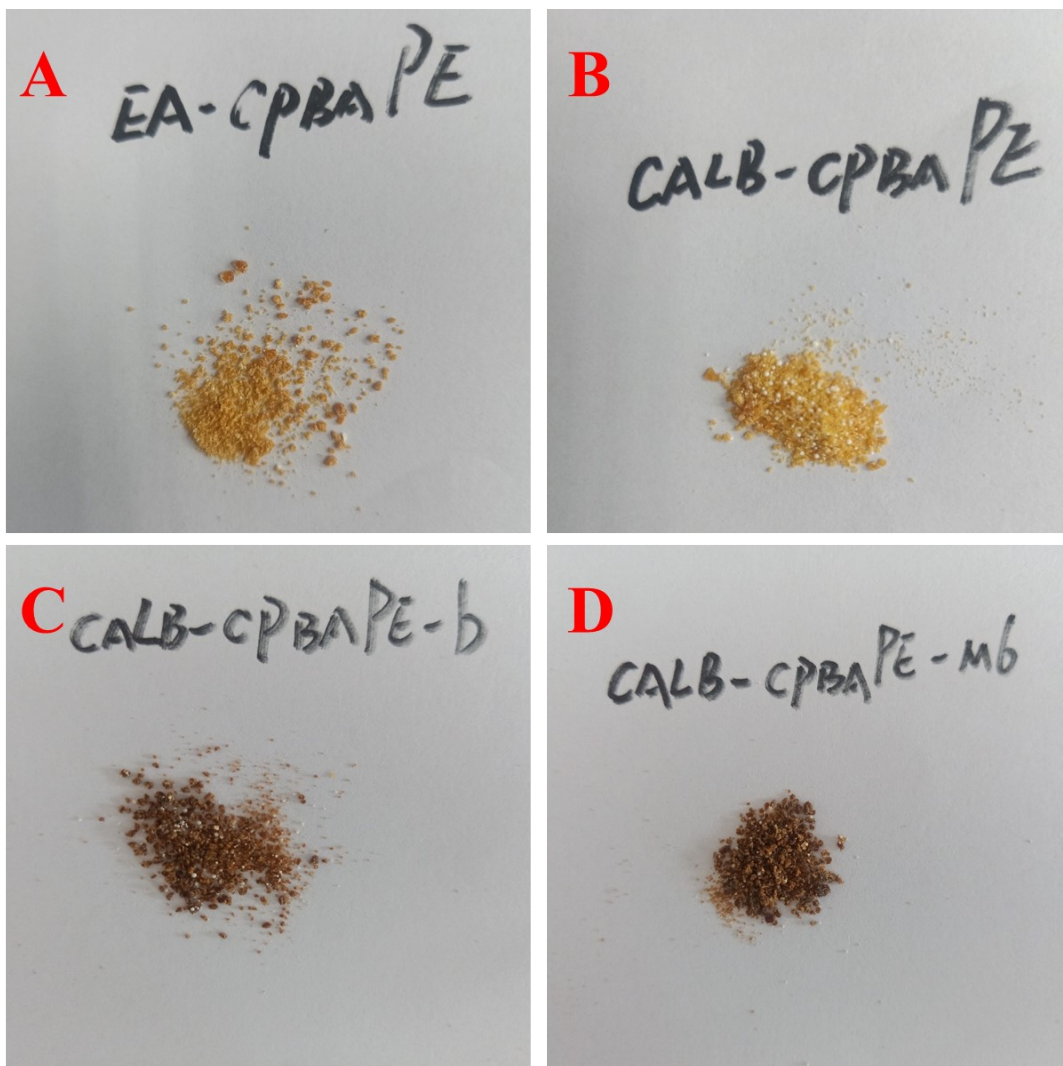

Fig. S3 Changes in polyethylene morphology during the treatment of CPBAPE by the CALB-EA-H<sub>2</sub>O<sub>2</sub> catalytic system and *T. fusca* cutinase M6 hydrolysis system (pathway III).

## NMR Data

**NMR Data for  $UVPE$ :**  $^1H$  NMR (700 MHz,  $C_6D_4Cl_2$ )  $\delta$  5.73 (td,  $J = 16.9, 6.7$  Hz), 4.90 (dd,  $J = 43.5, 13.7$  Hz), 3.55 – 3.48 (m,  $\underline{CH_2-OH}$ ), 2.21 (dt,  $J = 15.3, 7.7$  Hz,  $\underline{CH_2-C(O)-CH_2/CH_2-C(O)-O}$ ), 1.78 – 0.69 (m,  $CH_2-\underline{CH_2-CH_2}$ ).

**NMR Data for  $CALB-UVPE$ :**  $^1H$  NMR (700 MHz,  $C_6D_4Cl_2$ )  $\delta$  5.78 – 5.68 (m), 4.90 (dd,  $J = 44.4, 13.7$  Hz), 4.21 (ddd,  $J = 22.6, 12.2, 6.4$  Hz,  $C(O)-O\underline{CH_2}$ ), 3.51 (s,  $\underline{CH_2-OH}$ ), 2.23 (ddt,  $J = 29.1, 14.8, 6.8$  Hz,  $\underline{CH_2-C(O)-CH_2/CH_2-C(O)-O}$ ), 1.26 (s,  $CH_2-\underline{CH_2-CH_2}$ ).

**NMR Data for  $CALB-UVPE-M6$ :**  $^1H$  NMR (700 MHz,  $C_6D_4Cl_2$ )  $\delta$  5.73 (ddt,  $J = 16.9, 10.0, 6.5$  Hz), 5.01 – 4.78 (m), 3.54 – 3.49 (m,  $\underline{CH_2-OH}$ ), 2.32 – 2.15 (m,  $\underline{CH_2-C(O)-CH_2/CH_2-C(O)-O}$ ), 1.26 (s,  $CH_2-\underline{CH_2-CH_2}$ ).

**NMR Data for  $CPBAPE$ :**  $^1H$  NMR (700 MHz,  $C_6D_4Cl_2$ )  $\delta$  5.34 (t,  $J = 4.9$  Hz), 4.04 (t,  $J = 6.8$  Hz,  $C(O)-O\underline{CH_2}$ ), 3.82 (s,  $\underline{CH_2-Cl}$ ), 3.52 (s,  $\underline{CH_2-OH}$ ), 2.25 (dt,  $J = 21.8, 7.2$  Hz,  $\underline{CH_2-C(O)-CH_2/CH_2-C(O)-O}$ ), 1.24 (d,  $J = 19.9$  Hz,  $CH_2-\underline{CH_2-CH_2}$ ).

**NMR Data for  $CPBAPE-M6$ :**  $^1H$  NMR (700 MHz,  $C_6D_4Cl_2$ )  $\delta$  5.33 (t,  $J = 4.9$  Hz), 4.04 (t,  $J = 6.5$  Hz,  $C(O)-O\underline{CH_2}$ ), 3.81 (s,  $\underline{CH_2-Cl}$ ), 3.52 (d,  $J = 8.8$  Hz,  $\underline{CH_2-OH}$ ), 2.24 (dq,  $J = 24.6, 9.0, 8.0$  Hz,  $\underline{CH_2-C(O)-CH_2/CH_2-C(O)-O}$ ), 1.24 (d,  $J = 19.9$  Hz,  $CH_2-\underline{CH_2-CH_2}$ ).

**NMR Data for  $CALB-CPBAPE$ :**  $^1H$  NMR (700 MHz,  $C_6D_4Cl_2$ )  $\delta$  4.03 (q,  $J = 6.5$  Hz,  $C(O)-O\underline{CH_2}$ ), 3.82 (s,  $\underline{CH_2-Cl}$ ), 3.54 – 3.50 (m,  $\underline{CH_2-OH}$ ), 2.23 (ddd,  $J = 25.5, 12.8, 6.7$  Hz,  $\underline{CH_2-C(O)-CH_2/CH_2-C(O)-O}$ ), 1.78 – 0.70 (m,  $CH_2-\underline{CH_2-CH_2}$ ).

**NMR Data for  $CALB-CPBAPE-M6$ :**  $^1H$  NMR (700 MHz,  $C_6D_4Cl_2$ )  $\delta$  4.04 (t,  $J = 6.7$  Hz,  $C(O)-O\underline{CH_2}$ ), 3.82 (t,  $J = 6.4$  Hz,  $\underline{CH_2-Cl}$ ), 3.52 (d,  $J = 8.4$  Hz,  $\underline{CH_2-OH}$ ), 2.24 (ddt,  $J = 24.0, 16.4, 7.0$  Hz,  $\underline{CH_2-C(O)-CH_2/CH_2-C(O)-O}$ ), 1.24 (d,  $J = 19.9$  Hz,  $CH_2-\underline{CH_2-CH_2}$ ).

# <sup>1</sup>H NMR Figure

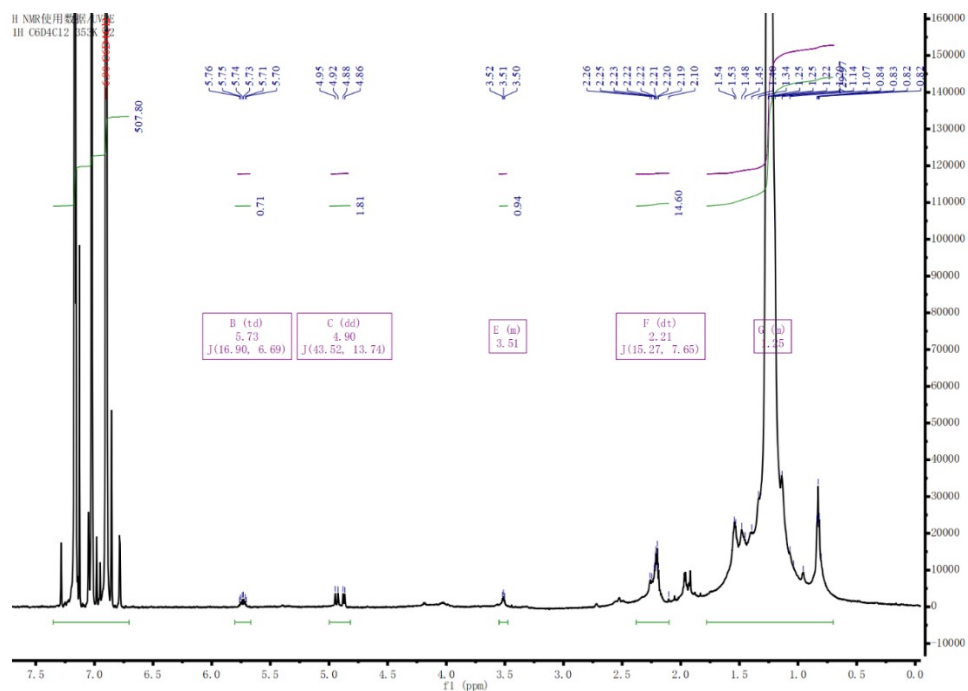

Fig. S4. <sup>1</sup>H NMR data for UVPE.

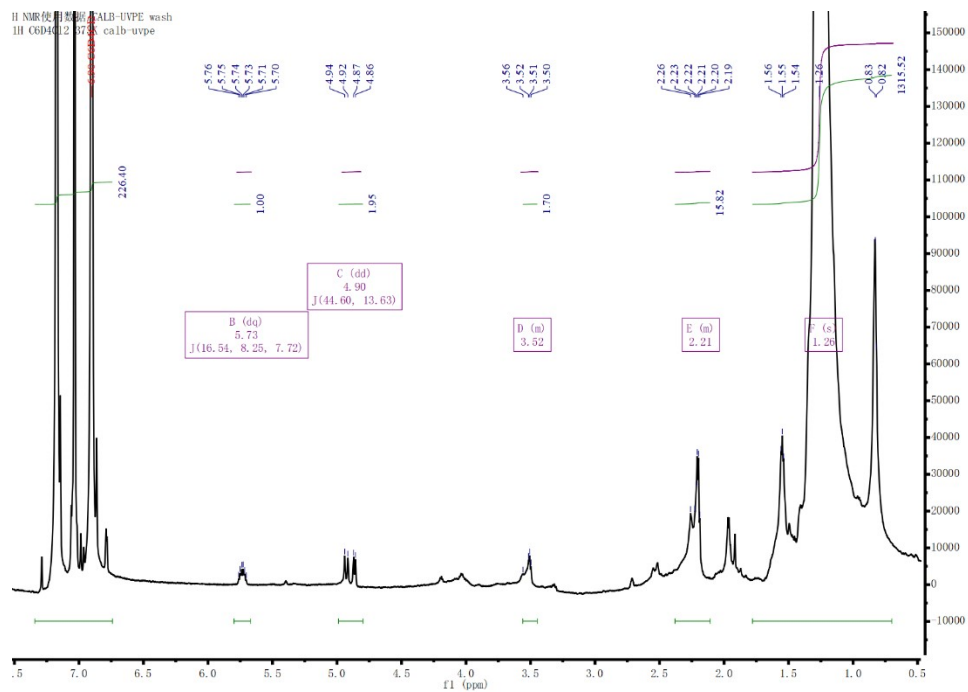

Fig. S5. <sup>1</sup>H NMR data for CALB-UVPE.

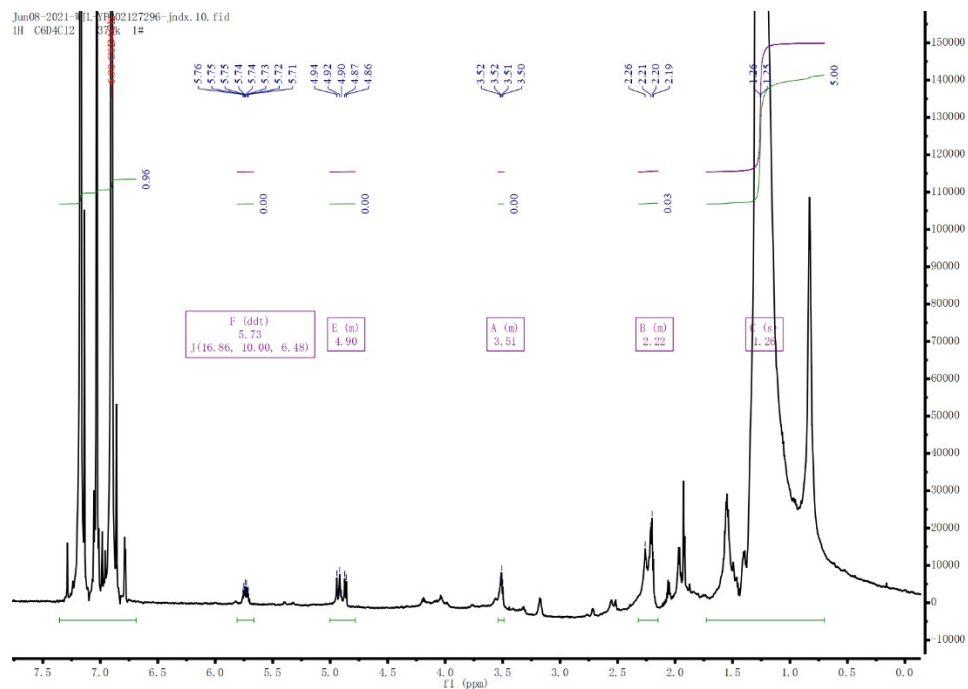

Fig. S6.  $^1\text{H}$  NMR data for  $\text{CALB-UVPE-M6}$ .

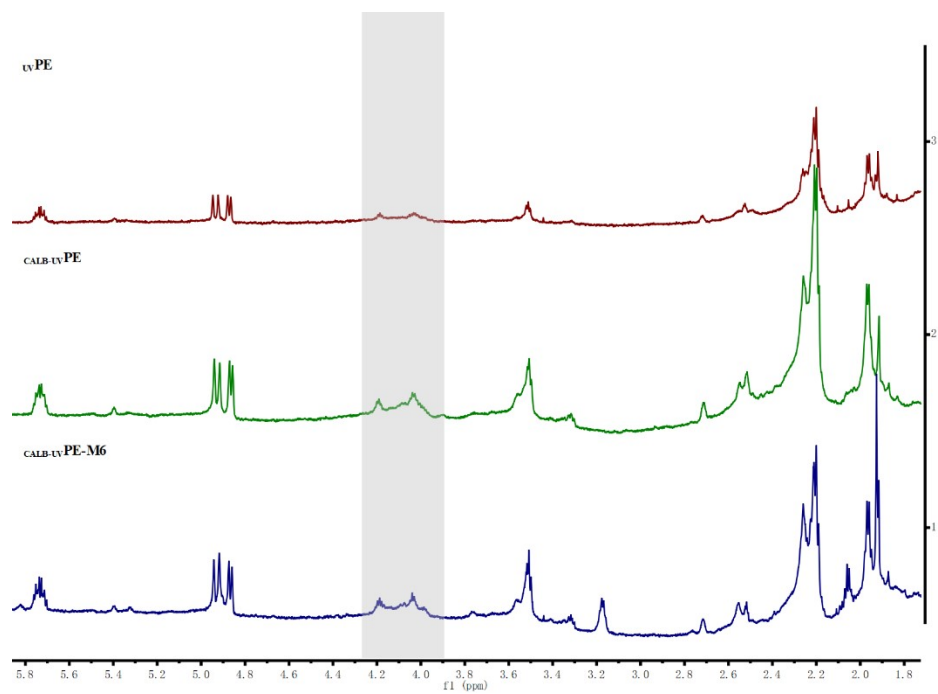

Fig. S7. A comparison of  $^1\text{H}$  NMR data on  $\text{UVPE}$ ,  $\text{CALB-UVPE}$ , and  $\text{CALB-UVPE-M6}$ . In the figure, the red, green, and blue lines are  $\text{UVPE}$ ,  $\text{CALB-UVPE}$ , and  $\text{CALB-UVPE-M6}$ , respectively, and gray area is  $\text{C(O)-OCH}_2$ .

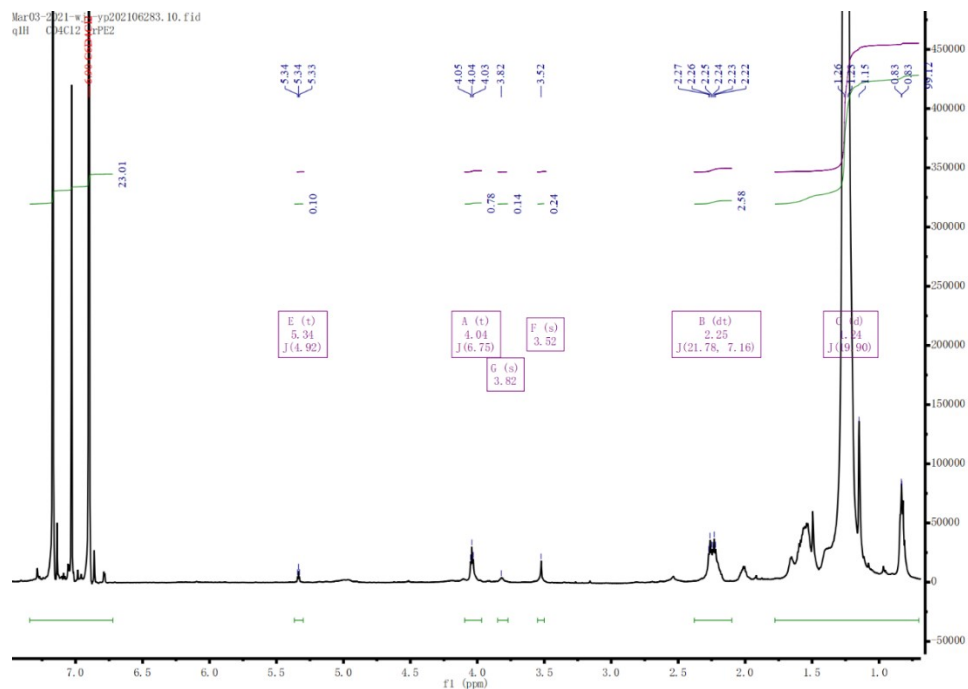

Fig. S8. <sup>1</sup>H NMR data for CPBAPE.

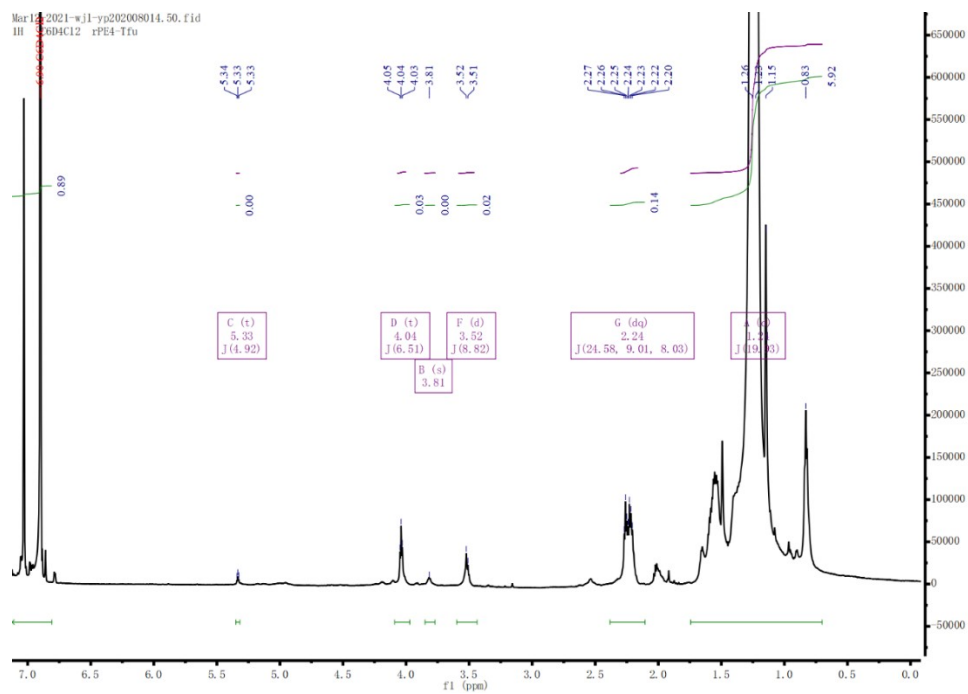

Fig. S9. <sup>1</sup>H NMR data for CPBAPE-M6.



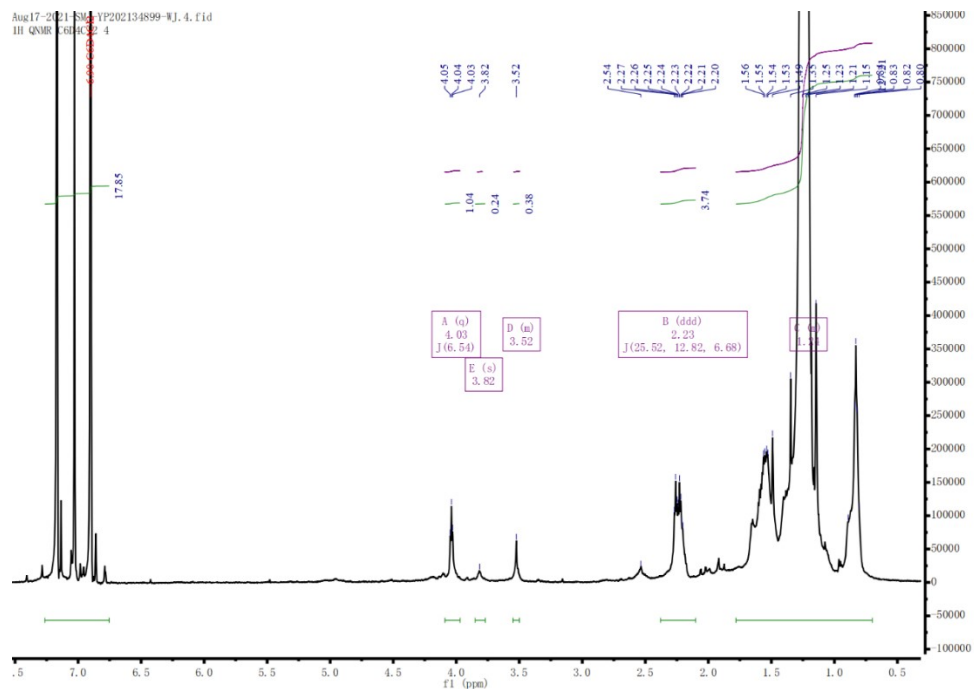

Fig. S10.  $^1\text{H}$  NMR data for CALB-CPBAPE.

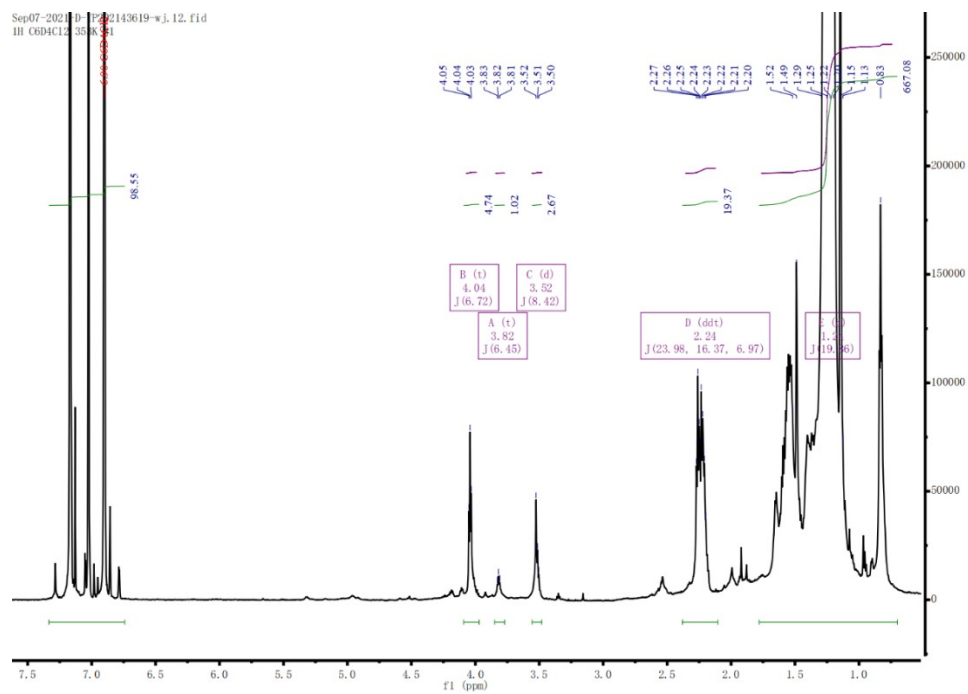

Fig. S11.  $^1\text{H}$  NMR data for CALB-CPBAPE-M6.

# <sup>13</sup>C NMR Figure

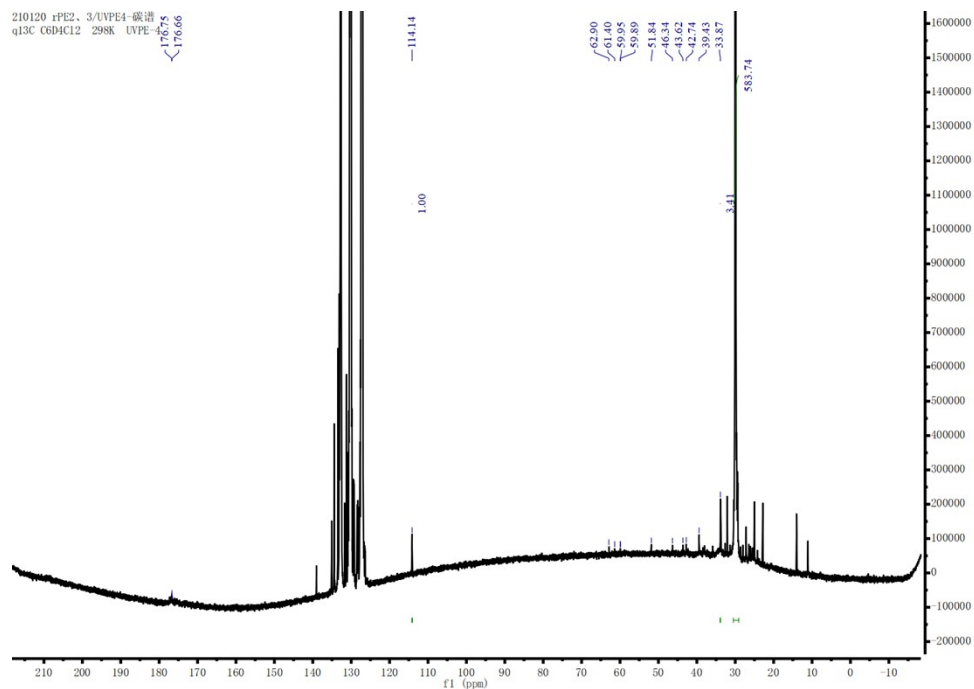

Fig. S12. <sup>13</sup>C NMR data for UVPE.

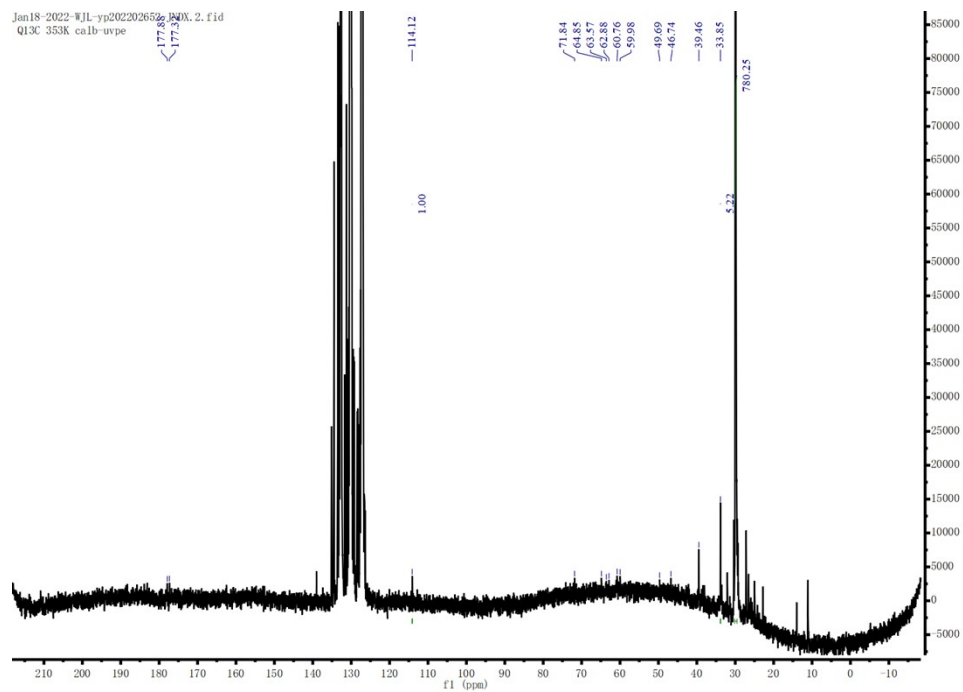

Fig. S13. <sup>13</sup>C NMR data for CALB-UVPE.

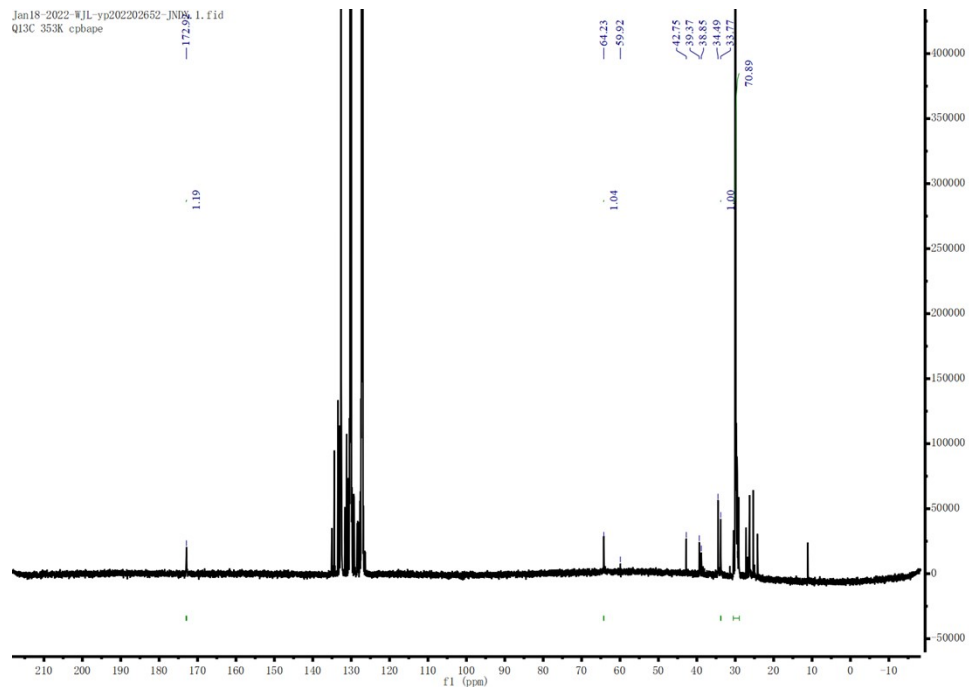

Fig. S14.  $^{13}\text{C}$  NMR data for CPBAPE.

## GC-MS Data

Table S1 Results of GC-MS for the experimental group  $\text{CALBPE}$  and the control group  $\text{EA-CALBPE}$ .

| Type    | Name                            | Formula  | CAS#       | $\xi$ ( $\text{CALBPE}$ ) | $\xi$ ( $\text{EA-CALBPE}$ ) |
|---------|---------------------------------|----------|------------|---------------------------|------------------------------|
| Alkanes | Tridecane                       | C13H28   | 629-50-5   | 6.33%                     | -                            |
| Alkanes | Heptadecane                     | C17H36   | 629-78-7   | 1.16%                     | -                            |
| Alkanes | Octadecane                      | C18H38   | 593-45-3   | 2.09%                     | -                            |
| Alkanes | Docosane                        | C22H46   | 629-97-0   | 3.41%                     | -                            |
| Alkanes | Hentriacontane                  | C31H64   | 630-04-6   | 4.13%                     | -                            |
| Acid    | Decanoic acid                   | C10H20O2 | 334-48-5   | 1.85%                     | -                            |
| Acid    | Dodecanoic acid                 | C12H24O2 | 143-07-7   | 1.42%                     | -                            |
| Acid    | Tridecanoic acid                | C13H26O2 | 638-53-9   | 0.84%                     | -                            |
| Acid    | Tetradecanoic acid              | C14H28O2 | 544-63-8   | 3.02%                     | -                            |
| Acid    | Pentadecanoic acid              | C15H30O2 | 1002-84-2  | 0.80%                     | -                            |
| Acid    | Palmitic Acid                   | C16H32O2 | 57-10-3    | 22.20%                    | 64.51%                       |
| Acid    | Heptadecanoic acid              | C17H34O2 | 506-12-7   | 0.94%                     | -                            |
| Acid    | Octadecanoic acid               | C18H36O2 | 57-11-4    | 24.09%                    | 35.49%                       |
| Acid    | Eicosanoic acid                 | C20H40O2 | 506-30-9   | 0.80%                     | -                            |
| Acid    | Behenic acid                    | C22H44O2 | 112-85-6   | 4.93%                     | -                            |
| Ester   | Undecanoic acid, ethyl ester    | C13H26O2 | 627-90-7   | 1.93%                     | -                            |
| Ester   | Dodecanoic acid, ethyl ester    | C14H28O2 | 106-33-2   | 1.95%                     | -                            |
| Ester   | Tetradecanoic acid, ethyl ester | C16H32O2 | 124-06-1   | 2.51%                     | -                            |
| Ester   | Pentadecanoic acid, ethyl ester | C17H34O2 | 41114-00-5 | 2.80%                     | -                            |
| Ester   | Hexadecanoic acid, ethyl ester  | C18H36O2 | 628-97-7   | 5.73%                     | -                            |
| Ester   | Heptadecanoic acid, ethyl ester | C19H38O2 | 14010-23-2 | 1.88%                     | -                            |
| Ester   | Octadecanoic acid, ethyl ester  | C20H40O2 | 111-61-5   | 2.56%                     | -                            |
| Ester   | Nonadecanoic acid, ethyl ester  | C21H42O2 | 18281-04-4 | 1.70%                     | -                            |
| Ester   | Eicosanoic acid, ethyl ester    | C22H44O2 | 18281-05-5 | 0.92%                     | -                            |

Note: “-” represents that the substance is not detected.

Table S2 Results of GC-MS for the enzymatic hydrolysate of oxidized polyethylene treated with *T. fusca* cutinase M6.

| Type    | Name             | Formula  | CAS#      | ξ                | ξ               | ξ              | ξ             | ξ           | ξ          |
|---------|------------------|----------|-----------|------------------|-----------------|----------------|---------------|-------------|------------|
|         |                  |          |           | (CALB-CPBAPE-M6) | (CALB-CPBAPE-B) | (CALB-UVPE-M6) | (CALB-UVPE-B) | (CPBAPE-M6) | (CPBAPE-B) |
| Alkanes | Octane           | C8H18    | 111-65-9  | -                | 0.71%           | 0.62%          | 0.42%         | 0.41%       | 1.00%      |
| Alkanes | Nonane           | C9H20    | 111-84-2  | 0.04%            | -               | -              | -             | -           | -          |
| Alkanes | Decane           | C10H22   | 124-18-5  | -                | -               | 0.44%          | 0.54%         | 0.18%       | -          |
| Alkanes | Undecane         | C11H24   | 1120-21-4 | 0.03%            | -               | -              | -             | 0.65%       | 0.12%      |
| Alkanes | Dodecane         | C12H26   | 112-40-3  | 0.15%            | 0.24%           | 0.62%          | -             | -           | 0.68%      |
| Alkanes | Tridecane        | C13H28   | 629-50-5  | 0.11%            | 0.08%           | -              | -             | -           | -          |
| Alkanes | Tetradecane      | C14H30   | 629-59-4  | 0.29%            | -               | 0.67%          | 0.81%         | 0.98%       | 0.87%      |
| Alkanes | Pentadecane      | C15H32   | 629-62-9  | 0.50%            | 3.54%           | 2.66%          | 2.39%         | 4.54%       | 4.47%      |
| Alkanes | Hexadecane       | C16H34   | 544-76-3  | -                | 1.65%           | 2.45%          | 1.21%         | 3.63%       | 5.58%      |
| Alkanes | Heptadecane      | C17H36   | 629-78-7  | 0.06%            | 0.84%           | 0.44%          | 0.94%         | 2.10%       | 2.02%      |
| Alkanes | Octadecane       | C18H38   | 593-45-3  | 0.25%            | 2.94%           | 2.34%          | 1.54%         | 6.46%       | 16.57%     |
| Alkanes | Nonadecane       | C19H40   | 629-92-5  | 0.61%            | 6.70%           | 2.02%          | 2.90%         | 2.89%       | 6.10%      |
| Alkanes | Eicosane         | C20H42   | 112-95-8  | 0.61%            | 1.16%           | 1.14%          | 1.33%         | 1.00%       | 3.68%      |
| Alkanes | Heneicosane      | C21H44   | 629-94-7  | 0.10%            | 2.82%           | 2.26%          | 0.84%         | 2.37%       | 5.56%      |
| Alkanes | Docosane         | C22H46   | 629-97-0  | 0.13%            | 0.79%           | 0.54%          | 0.45%         | -           | 1.94%      |
| Alkanes | Tricosane        | C23H48   | 638-67-5  | -                | 0.98%           | 0.15%          | 0.52%         | 0.24%       | 0.74%      |
| Alkanes | Tetracosane      | C24H50   | 646-31-1  | 0.22%            | 0.66%           | 0.88%          | 0.93%         | 1.33%       | 1.56%      |
| Alkanes | Hexacosane       | C26H54   | 630-01-3  | -                | -               | 0.17%          | -             | -           | -          |
| Alkanes | Heptacosane      | C27H56   | 593-49-7  | 0.40%            | 1.00%           | 1.24%          | 2.13%         | 2.36%       | 4.99%      |
| Alkanes | Octacosane       | C28H58   | 630-02-4  | -                | -               | -              | -             | 0.16%       | -          |
| Alkanes | Hentriacontanone | C31H64   | 630-04-6  | 0.43%            | 1.18%           | 2.06%          | 1.19%         | 1.72%       | 2.31%      |
| Acid    | Butyric acid     | C4H8O2   | 107-92-6  | -                | -               | 0.71%          | 0.12%         | 0.24%       | -          |
| Acid    | Pentanoic acid   | C5H10O2  | 109-52-4  | 0.05%            | -               | -              | 0.56%         | -           | -          |
| Acid    | Hexanoic acid    | C6H12O2  | 142-62-1  | 46.50%           | 7.08%           | 13.80%         | 15.12%        | 10.53%      | 1.31%      |
| Acid    | Heptanoic Acid   | C7H14O2  | 111-14-8  | 0.02%            | -               | 0.63%          | 0.02%         | 3.87%       | -          |
| Acid    | Octanoic Acid    | C8H16O2  | 124-07-2  | 38.19%           | 49.41%          | 36.76%         | 50.83%        | 38.02%      | 24.85%     |
| Acid    | Decanoic Acid    | C10H20O2 | 334-48-5  | 3.84%            | 8.70%           | 6.02%          | 7.11%         | 4.06%       | 8.30%      |
| Acid    | Dodecanoic acid  | C12H24O2 | 143-07-7  | 0.91%            | 2.58%           | 2.26%          | 2.19%         | 1.57%       | 1.66%      |

|      |                   |                                                |          |       |       |        |       |       |       |
|------|-------------------|------------------------------------------------|----------|-------|-------|--------|-------|-------|-------|
| Acid | Myristoleic acid  | C <sub>14</sub> H <sub>28</sub> O <sub>2</sub> | 544-63-8 | 0.80% | 1.75% | 2.96%  | 1.86% | 0.48% | 0.25% |
| Acid | Palmitic Acid     | C <sub>16</sub> H <sub>32</sub> O <sub>2</sub> | 57-10-3  | 4.17% | 4.05% | 12.04% | 3.06% | 7.06% | 4.39% |
| Acid | Octadecanoic acid | C <sub>18</sub> H <sub>36</sub> O <sub>2</sub> | 57-11-4  | 1.59% | 1.15% | 3.98%  | 0.98% | 2.84% | 1.04% |

---

Note: “-” shows that the substance was not detected. “B” shows the use of inactivated enzymes as the control group.

## Other data

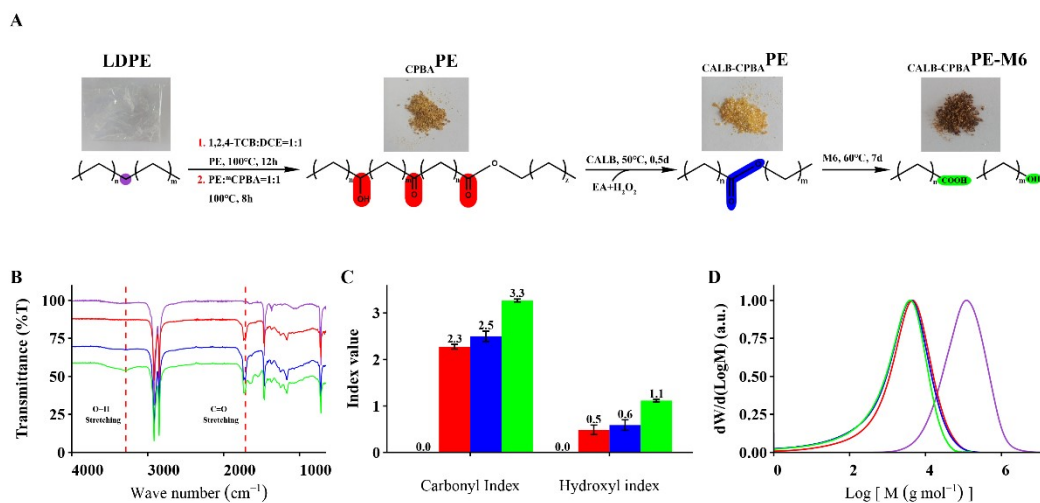

Fig. S15. LDPE degradation based on the <sup>m</sup>CPBA catalysis system, CALB-EA-H<sub>2</sub>O<sub>2</sub> catalysis system, and *T. fusca* cutinase hydrolysis system (pathway III). (A) Schematic diagram of the preparation and degradation pathways of oxidized polyethylene in pathway III. (B) FT-IR spectrum (4000–400 cm<sup>-1</sup>); the red dashed lines are the absorption peaks of O-H and C=O. (C) Comparison of TCI and HI in terms of LDPE, CPBA-PE, CALB-CPBA-PE, and CALB-CPBA-PE-M6. (E) HT-GPC results; distribution of the curves of dW/d(LogM)–LogM. The purple represents LDPE, red is CPBA-PE, blue is CALB-CPBA-PE, and green is CALB-CPBA-PE-M6.

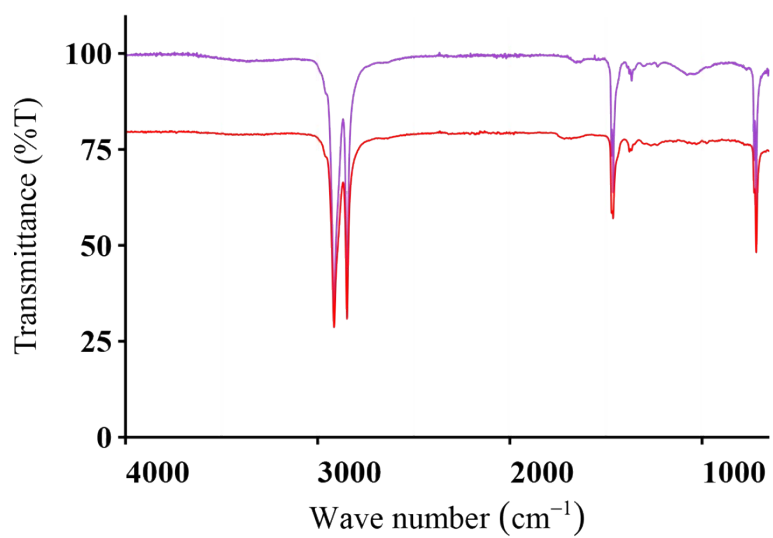

Fig S16. FT-IR data of *T.fusca* cutinase using LDPE as substrate. The red line is the result of *T.fusca* cutinase treatment and the purple line is LDPE.



Table S3 Results of HT-GPC and <sup>1</sup>H NMR detection of polyethylene samples in the pathway III.

| Group          | HT-GPC |    | □ | <sup>1</sup> H NMR |                    |
|----------------|--------|----|---|--------------------|--------------------|
|                | Mw     | Mn |   | □                  | A:E:K <sup>a</sup> |
| CALB-CPBAPE    | 6261   | 30 |   | 24:33:43           | 4.95               |
| CALB-CPBAPE-M6 | 4685   | 44 | □ | 32:27:41           | 5.31               |

- a. A represents a hydroxyl group, E represents an ester bond, and K represents a carbonyl group
- b. TF=A+E+K; the number of four functional groups per 100 degrees of polymerized polyethylene
- c. Treatment of oxidized polyethylene with *T. fusca* cutinase M6
